# Supplementary material for: Secreted Cytokines within the Urine of AKI Patients Modulate TP53 and SIRT1 Levels in a Human Podocyte Cell Model
Source: MDPI journal article supplement (doi:10.3390/ijms24098228), 2023-05-04
Supplement: s1 [file s1]

## Supplemental Material Table of Contents

Table S1: PCR Primers

Table S2: Antibodies

Supplementary Figure S1: Cytokine Array pictures 24 post-surgery.

Supplementary Figure S2: Cytokine Array pictures 72 post-surgery.

Supplementary Figure S3: Quantification of the western blots and full-sized blot images.

**Table S1:** PCR Primers

| Primer name         | Sequence                       | Annealing temperature (°C) | Product length (bp) |
|---------------------|--------------------------------|----------------------------|---------------------|
| RPL0 s              | 5'-TCGACAATGGCAGCATCTAC-3'     | 60                         | 195                 |
| RPL0 as             | 5'-ATCCGTCTCCACAGACAAGG-3'     |                            |                     |
| SIRT1 (Exon 1-2) s  | 5'-AGGGCGAGGAGGAGGAAGAG-3'     | 60                         | 122                 |
| SIRT1 (Exon 1-2) as | 5'-GGCTCTATCCTCCTCATCACTTTC-3' |                            |                     |
| TP53 s              | 5'-CAGGGCAGCTACGGTTTCC-3'      | 60                         | 157                 |
| TP53 as             | 5'-CAGTTGGCAAAACATCTTGTGAG-3'  |                            |                     |

**Table S2:** Antibodies

| Antigen                    | Company                         | Dilution (IF/WB) |
|----------------------------|---------------------------------|------------------|
| Rabbit GAPDH               | Cell Signaling #2118            | n.a./1:1000      |
| Rabbit pH2A.X (Ser139)     | Cell Signaling #9718S           | 1:200/1:1000     |
| Mouse TP53                 | Merck Millipore #OP43           | n.a./1:1000      |
| Mouse SIRT1                | Abcam #ab110304                 | 1:200/1:1000     |
| Anti-mouse Alexa Fluor 488 | Invitrogen #A11070              | 1:500            |
| Anti-mouse HRP-labeled     | Thermo Fisher Scientific #NA931 | 1:4000           |
| Anti-rabbit HRP-labeled    | Cell Signaling #7074S           | 1:1000           |

# AKI stage 2/3

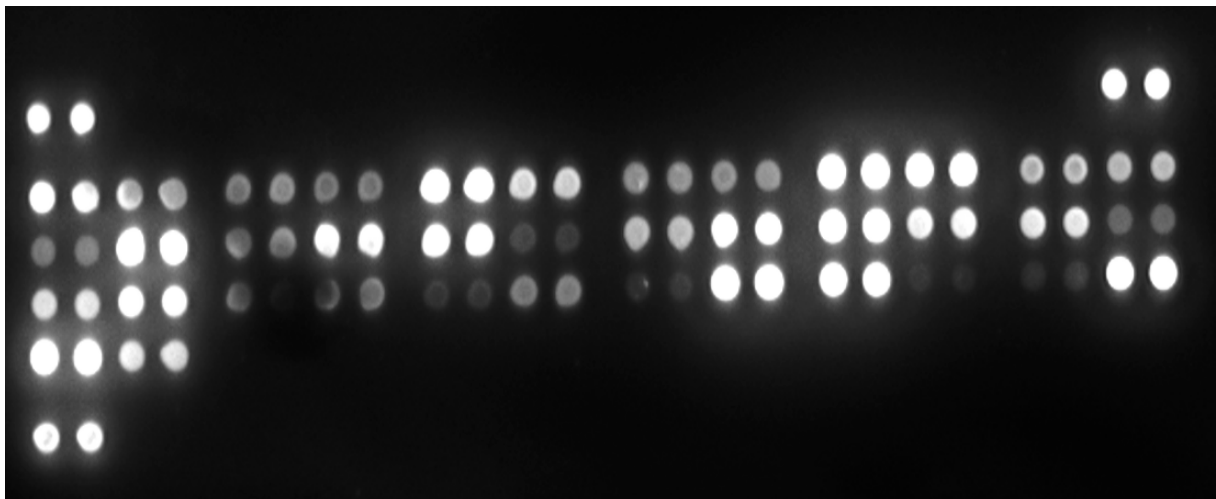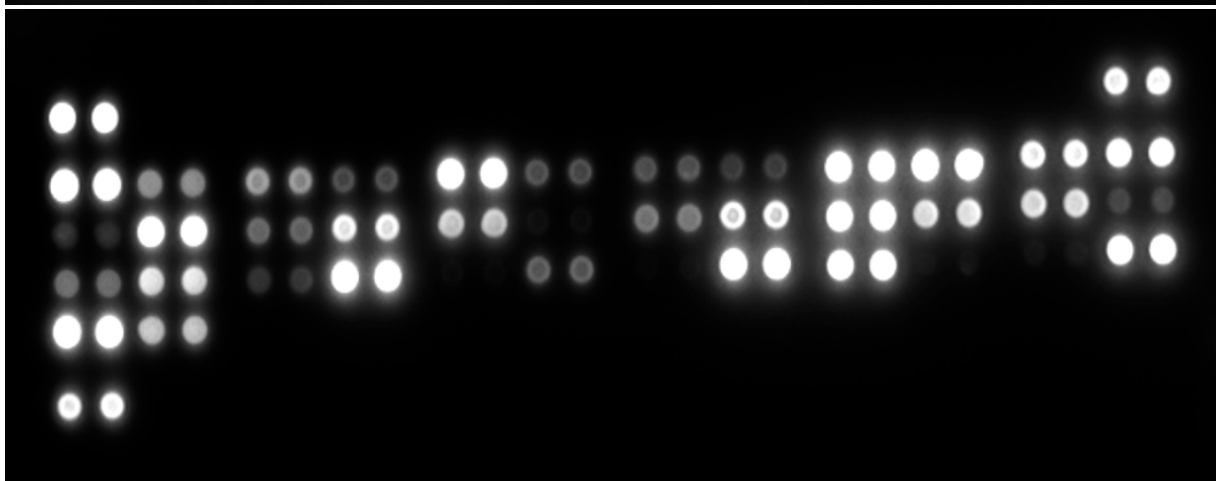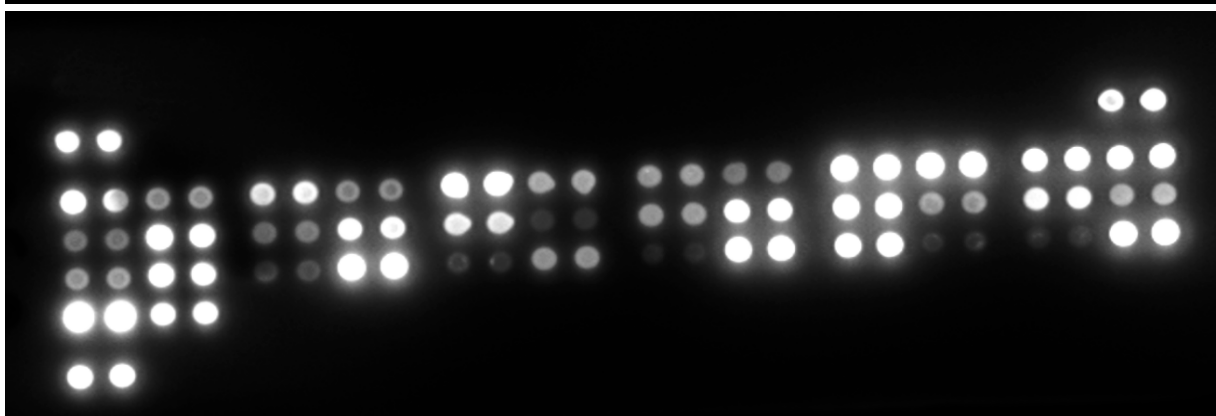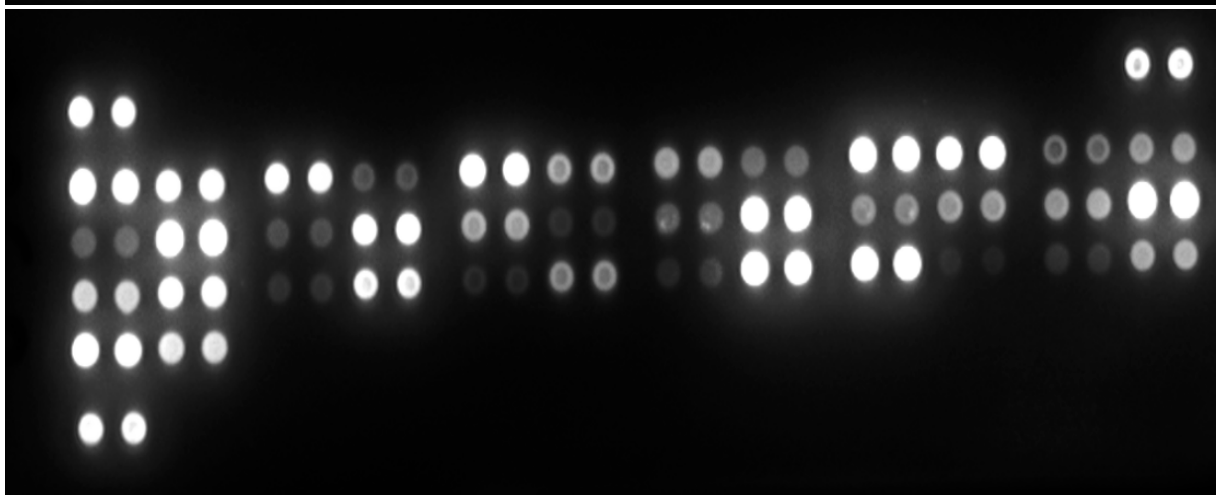

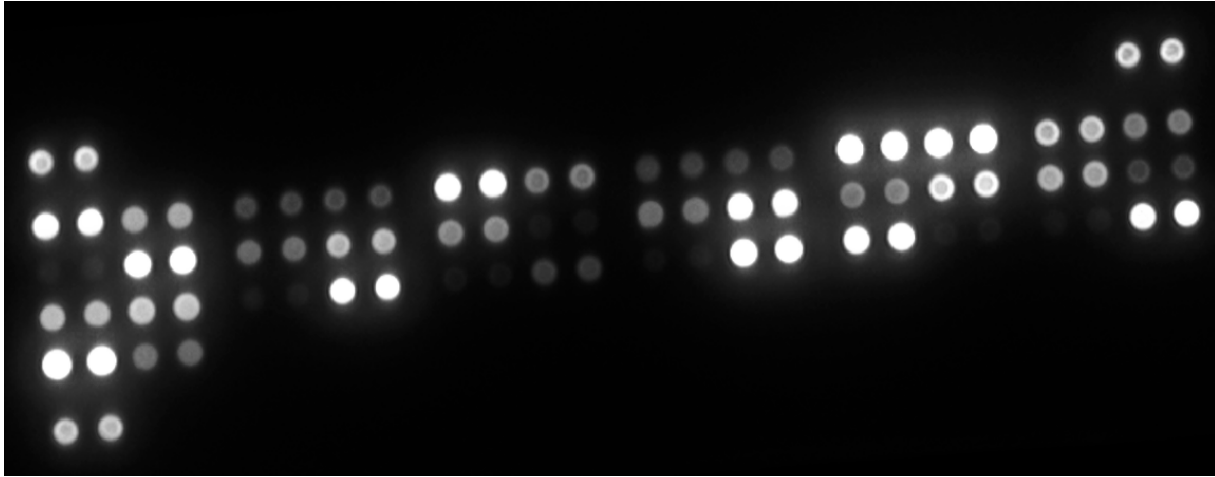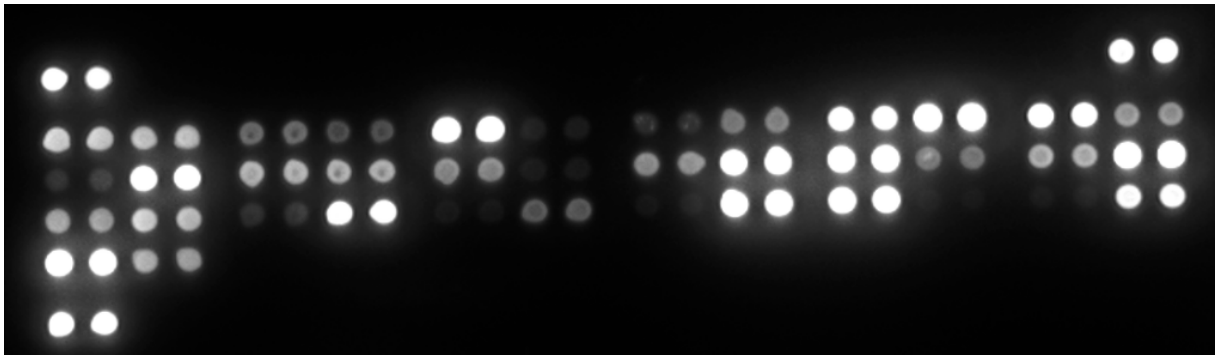

healthy

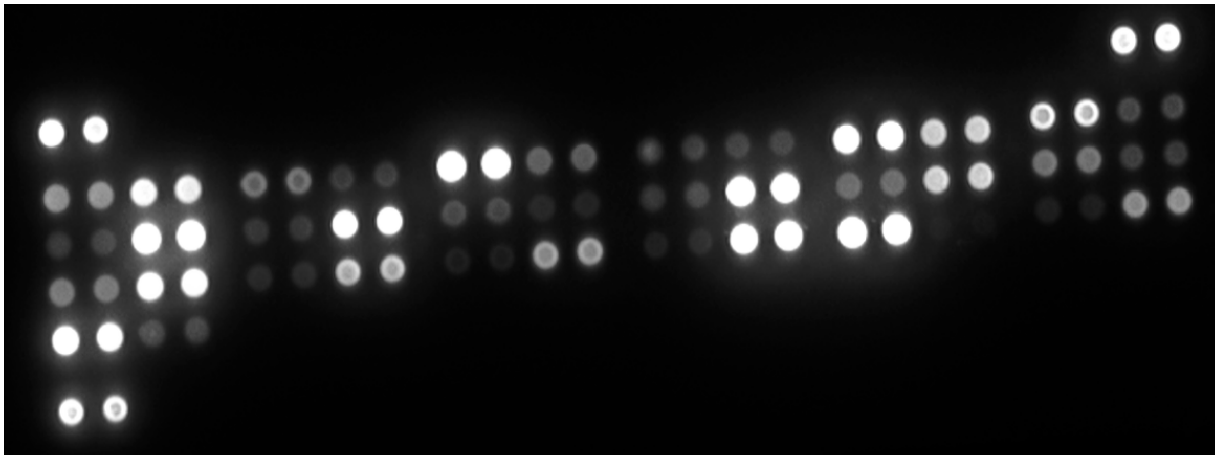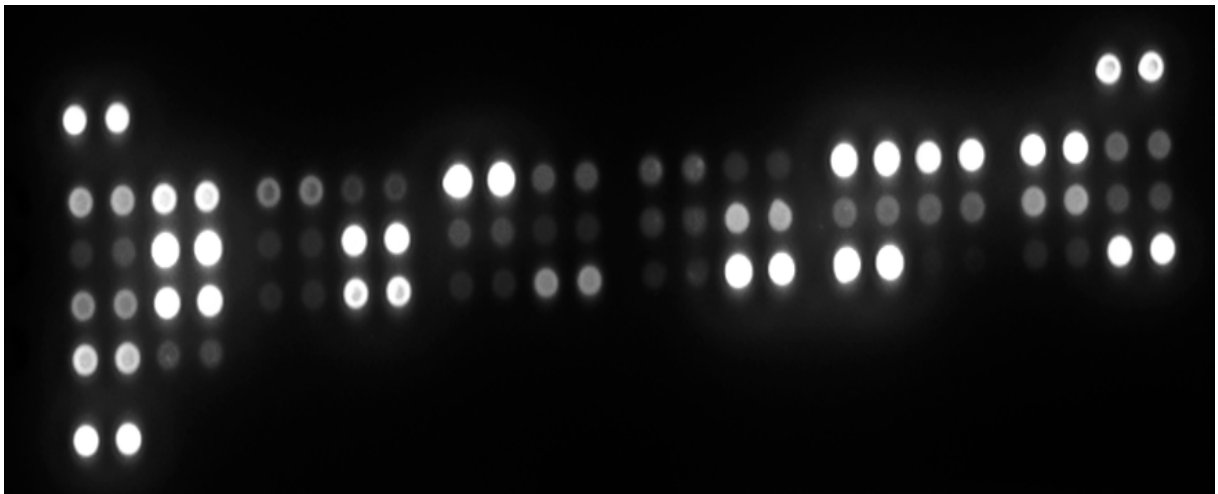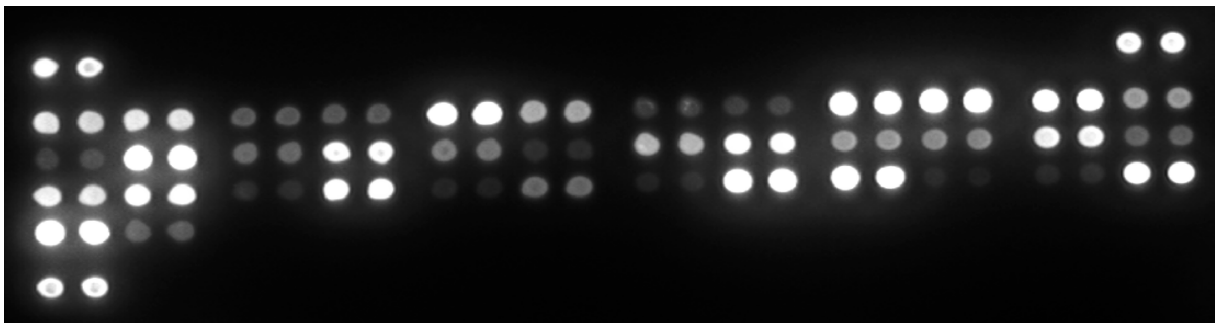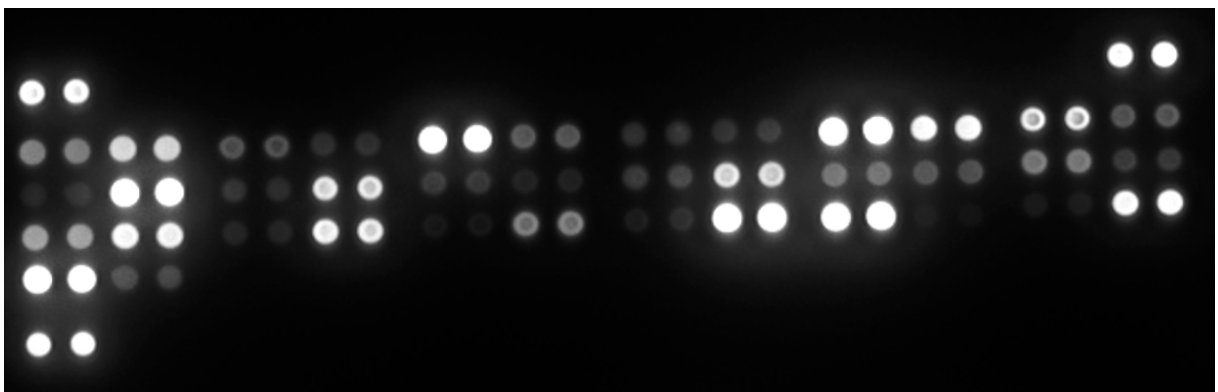

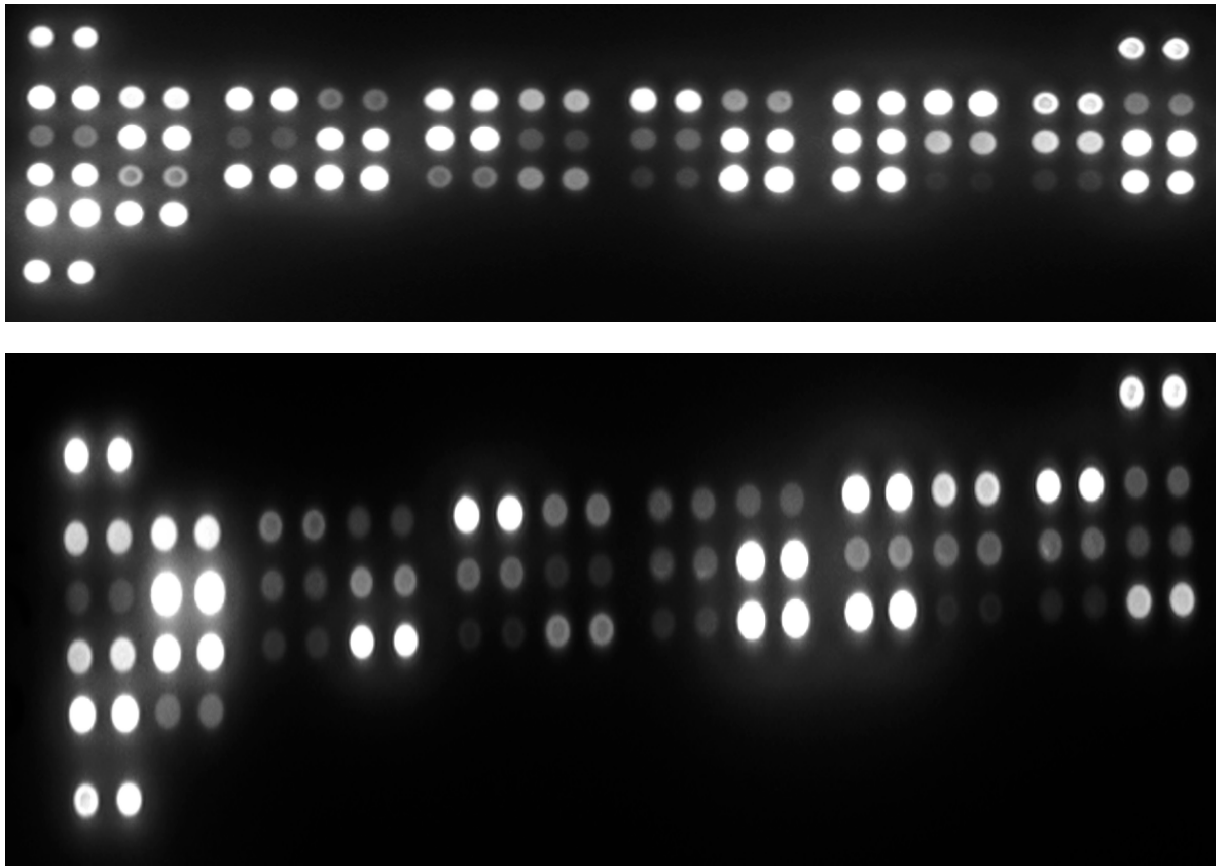

**Supplementary Figure S1:** Cytokine Array pictures 24 post-surgery.

Pooled healthy

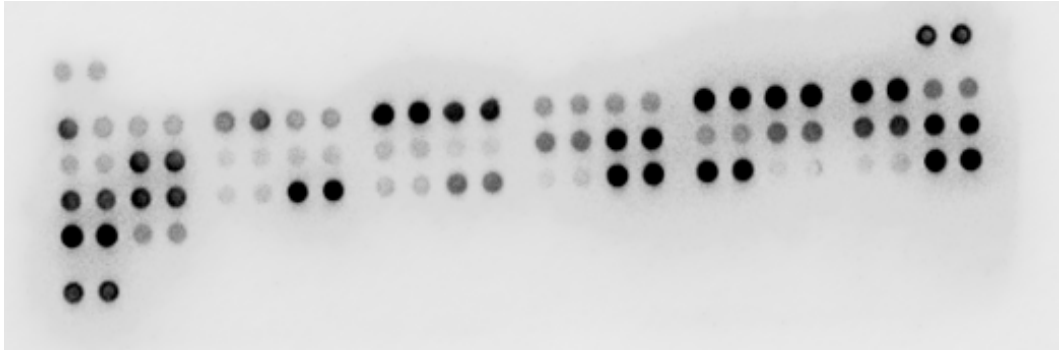

pooled female

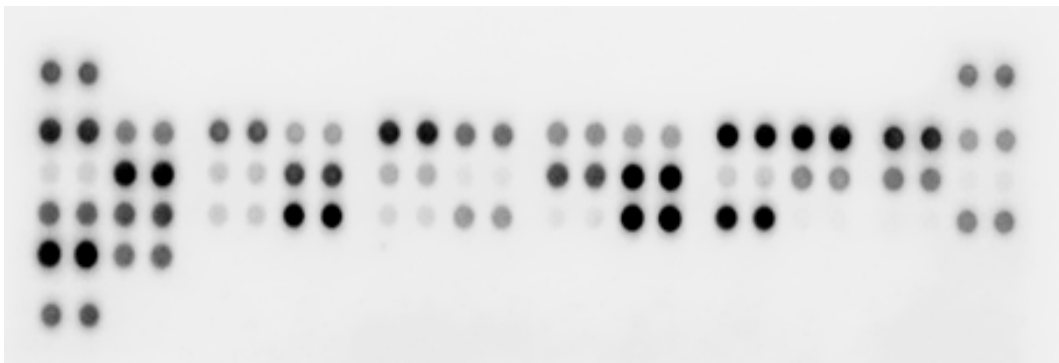

pooled male

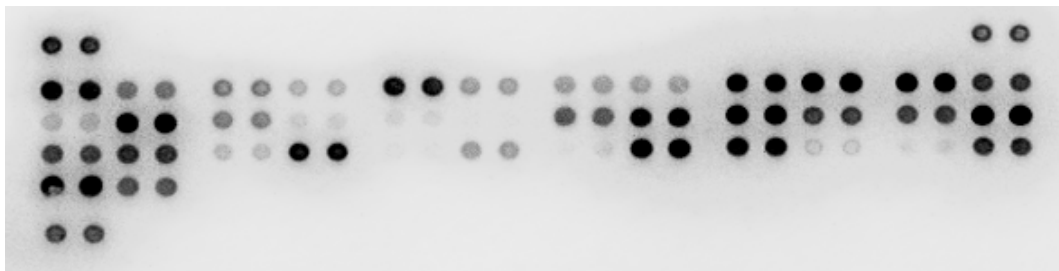

**Supplementary Figure S2:** Cytokine Array pictures 72 post-surgery.

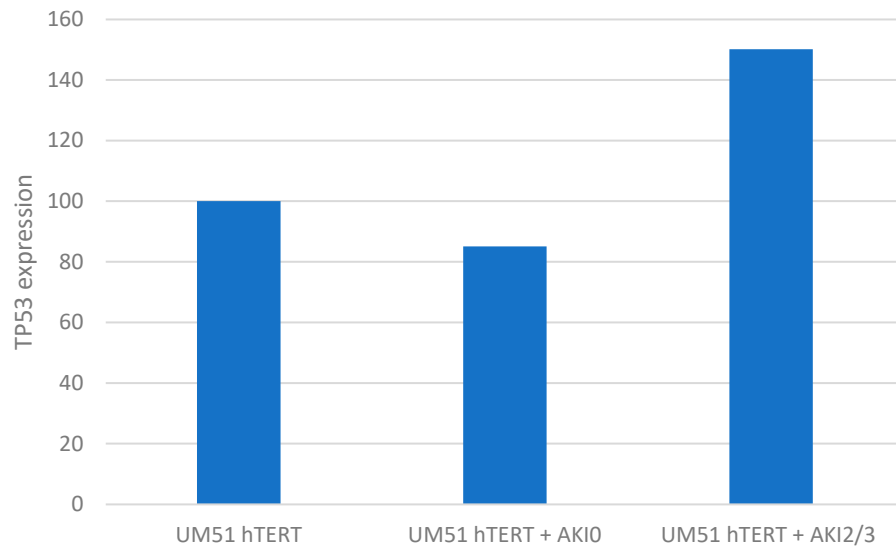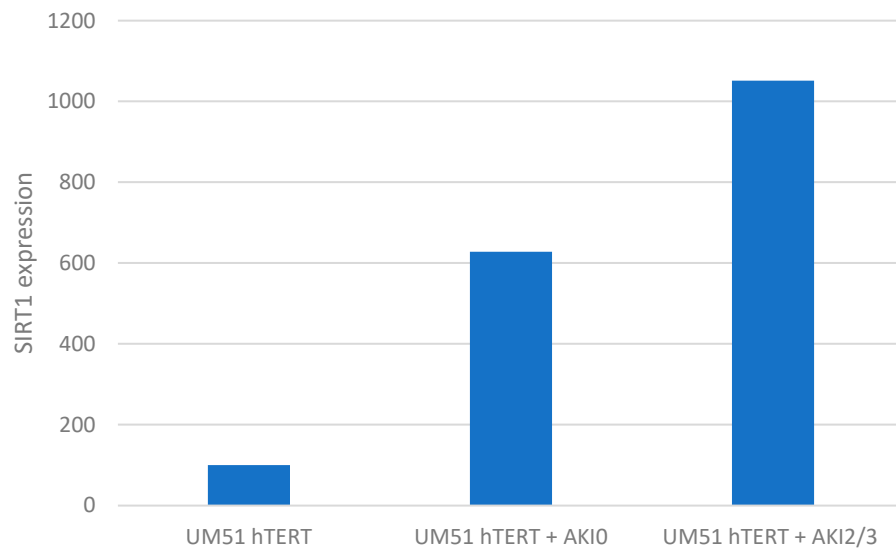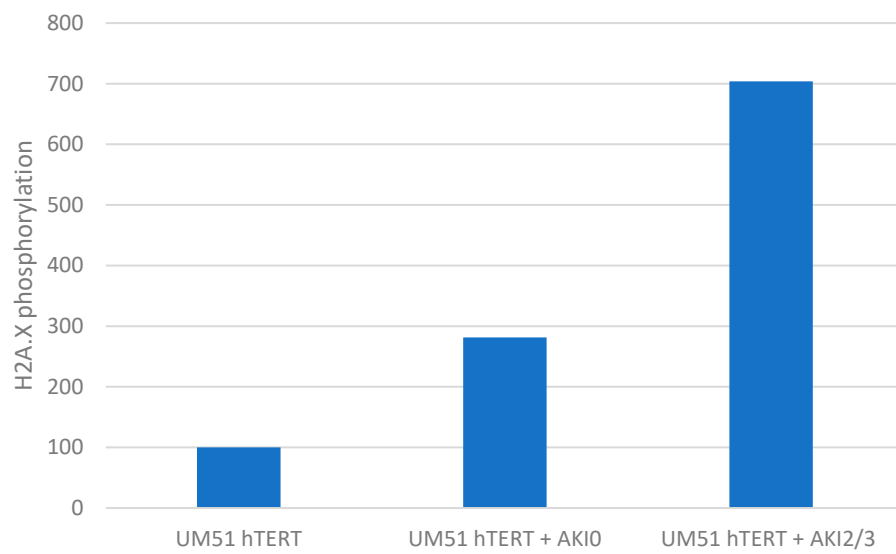



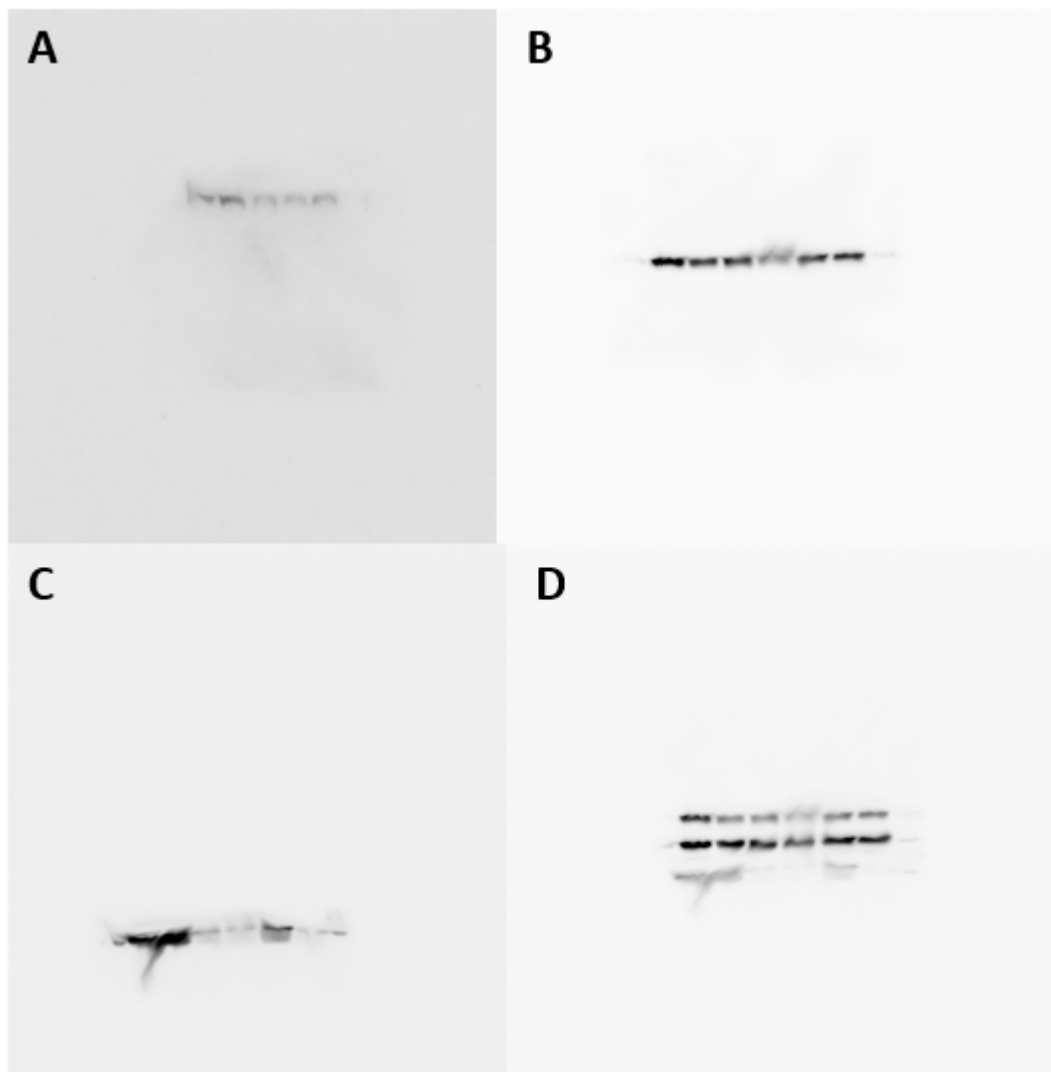

**Supplementary Figure S3:** Quantification of the western blots and full-sized blot images. Western blot full-sized images are given for SIRT1 (A), TP53 (B), H2A.X (C) and GAPDH (D). UM51-hTERT control podocytes, cultured with urine from AKI0 patients and with urine from AKI 2/3 patients are represented in lane 1, 2 and 5, respectively.
